# Supplementary material for: Structural basis for transcription activation by the nitrate-responsive regulator NarL
Source: PubMed Central journal article supplement — Nucleic Acids Res. 2024 Jan 9;52(3):1471–82. doi: 10.1093/nar/gkad1231 (PMC10853779; doi:10.1093/nar/gkad1231), 2024-01-09
Supplement: gkad1231_supplemental_file.pdf [file gkad1231_supplemental_file.pdf]

## Supplementary Information for

### **Title: Structural basis for transcription activation by the nitrate-responsive regulator NarL**

**Authors:** Dmytro Kompaniiets<sup>1,†</sup>, Lina He<sup>2,3,†</sup>, Dong Wang<sup>1</sup>, Wei Zhou<sup>2</sup>, Yang Yang<sup>4</sup>, Yangbo Hu<sup>2,5,\*</sup>, Bin Liu<sup>1,\*</sup>

#### **Affiliations:**

<sup>1</sup>Section of Transcription & Gene Regulation, The Hormel Institute, University of Minnesota, Austin, MN 55912, USA

<sup>2</sup>State Key Laboratory of Virology, Wuhan Institute of Virology, Center for Biosafety Mega-Science, Chinese Academy of Sciences, Wuhan 430071, China

<sup>3</sup>University of Chinese Academy of Sciences, Beijing 100049, China

<sup>4</sup>Roy J. Carver Department of Biochemistry, Biophysics and Molecular Biology, Iowa State University, Ames, IA 50011, USA

<sup>5</sup>Hubei JiangXia Laboratory, Wuhan 430071, China

† The authors wish it to be known that, in their opinion, the first two authors should be regarded as Joint First Authors.

\* To whom correspondence should be addressed. Tel: +1 507 437 9646; Email: liu00794@umn.edu

Correspondence may also be addressed to Yangbo Hu. Tel: +86 27 8719 9354; Email: ybhu@wh.iov.cn

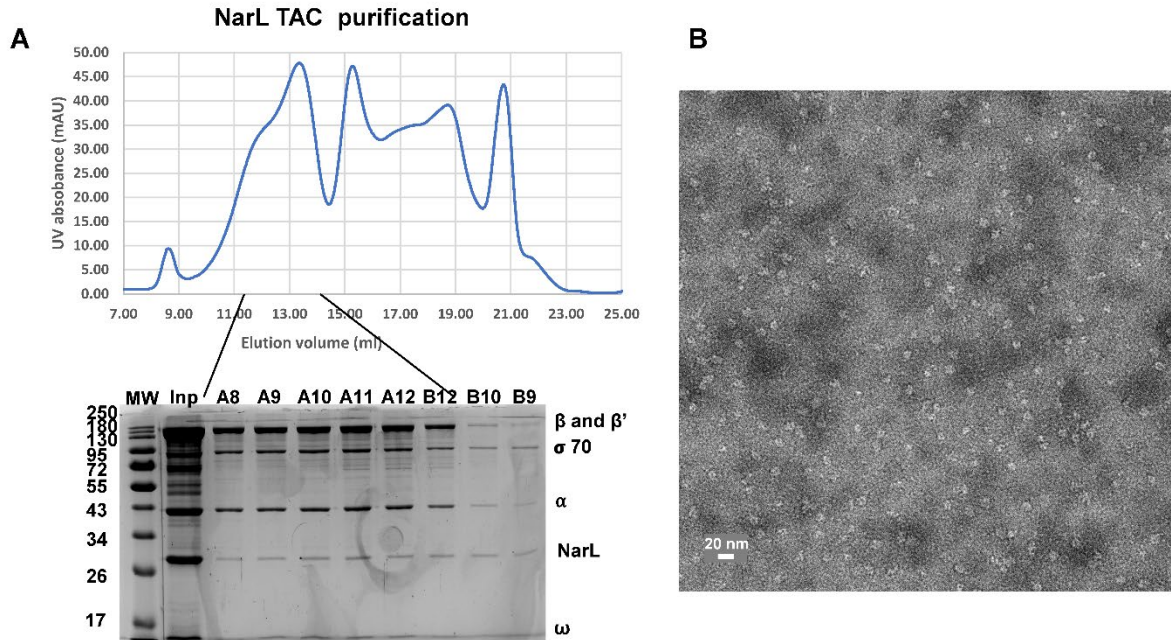

**Supplementary Figure S1. Isolation of NarL-TAC.** (A) Size exclusion chromatography (top) and SDS-PAGE analysis (bottom) of NarL-TAC. MW - molecular weight markers; Inp – input; A8 to B12 NarL-TAC peak elution fractions. Harvested peaks contain all the components. (B) Negative staining visualization of the NarL-TAC. Negative staining EM was performed to confirm sample quality, absence of aggregation and estimate general particle size.

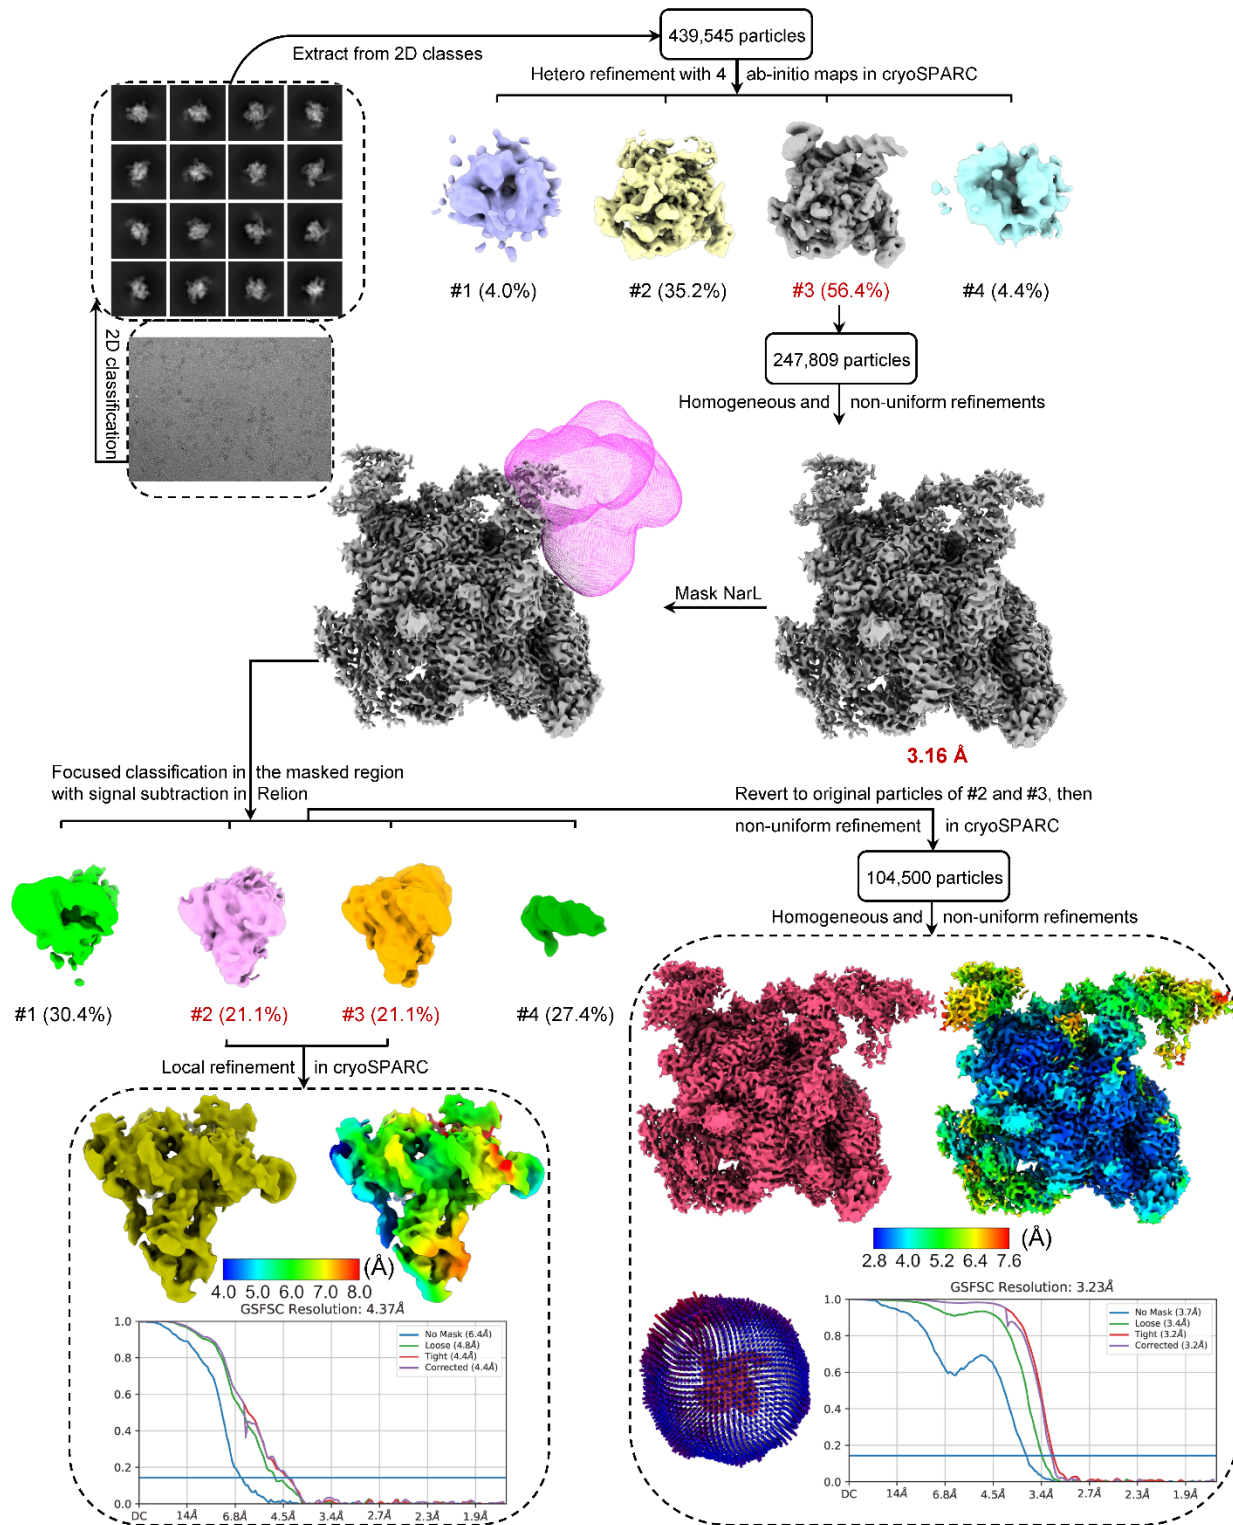

**Supplementary Figure S2. Flow chart of cryo-EM image processing.** Representative raw cryo-EM image and 2D classes are presented. 3D refinements using all the particles from good 3D classes generated a 3.16 Å map. Further masked 3D classification and local refinement generated a 4.37 Å map, clearly visualizing the density for the NarL/DNA region. Particles with good signal of NarL/DNA region were reverted to original particles and refined in cryoSPARC, producing a final 3.23 Å map for the NarL-TAC. Angular distribution plot, the final maps, half-map FSC curves, and accompanying local resolution illustrations are enclosed in the dashed black boxes.

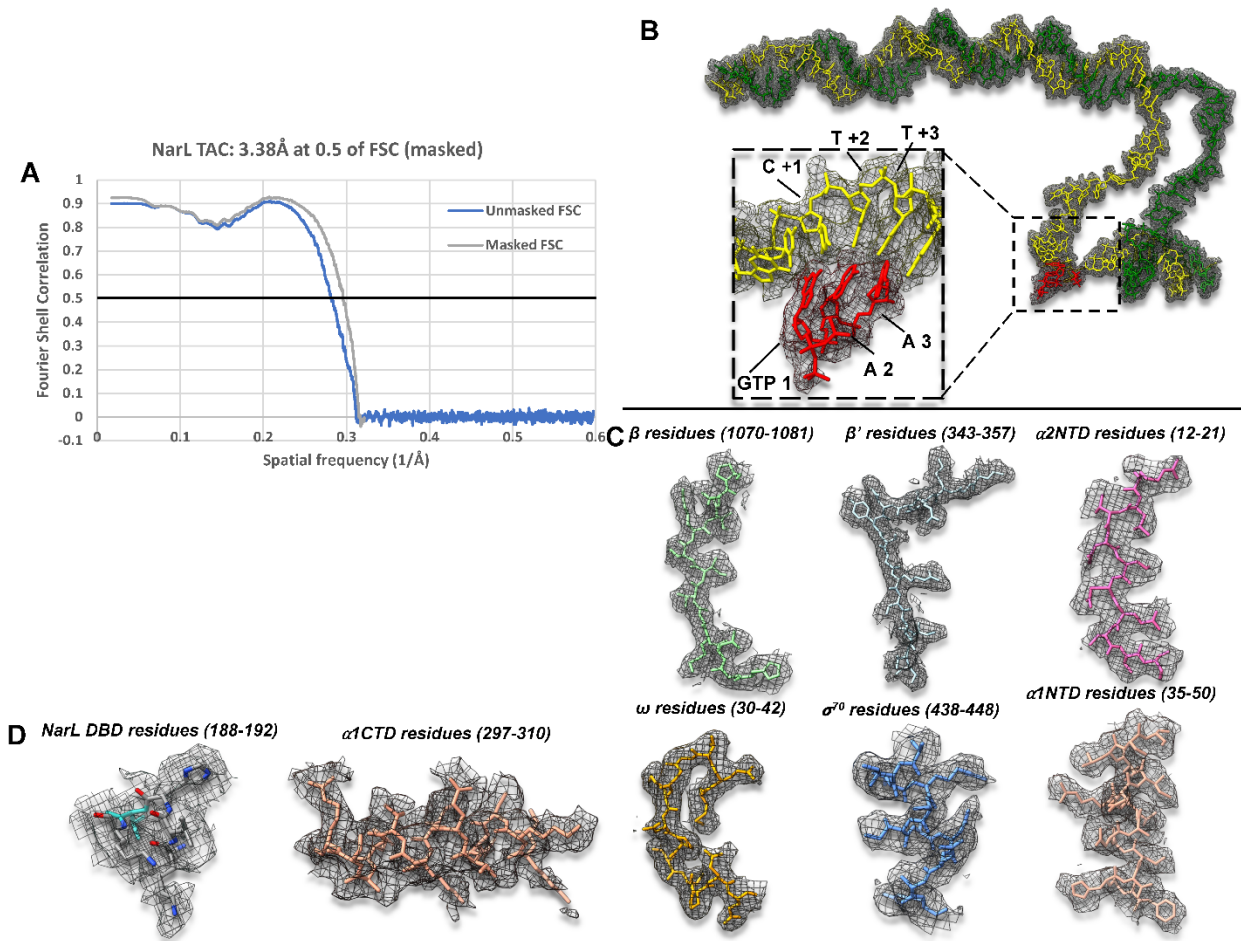

**Supplementary Figure S3. Cryo-EM validations of NarL-TAC.** (A) Model-to-map FSC curves. (B) Cryo-EM density of the promoter DNA with the highlighted RNA/DNA hybrid, confirming *de novo* RNA synthesis. Split maps were used here (color-zone 2.5 Å). (C) Cryo-EM densities of the represented regions of NarL-TAC. (D) Cryo-EM densities of the NarL/DNA/ $\alpha$ CTD interaction regions.



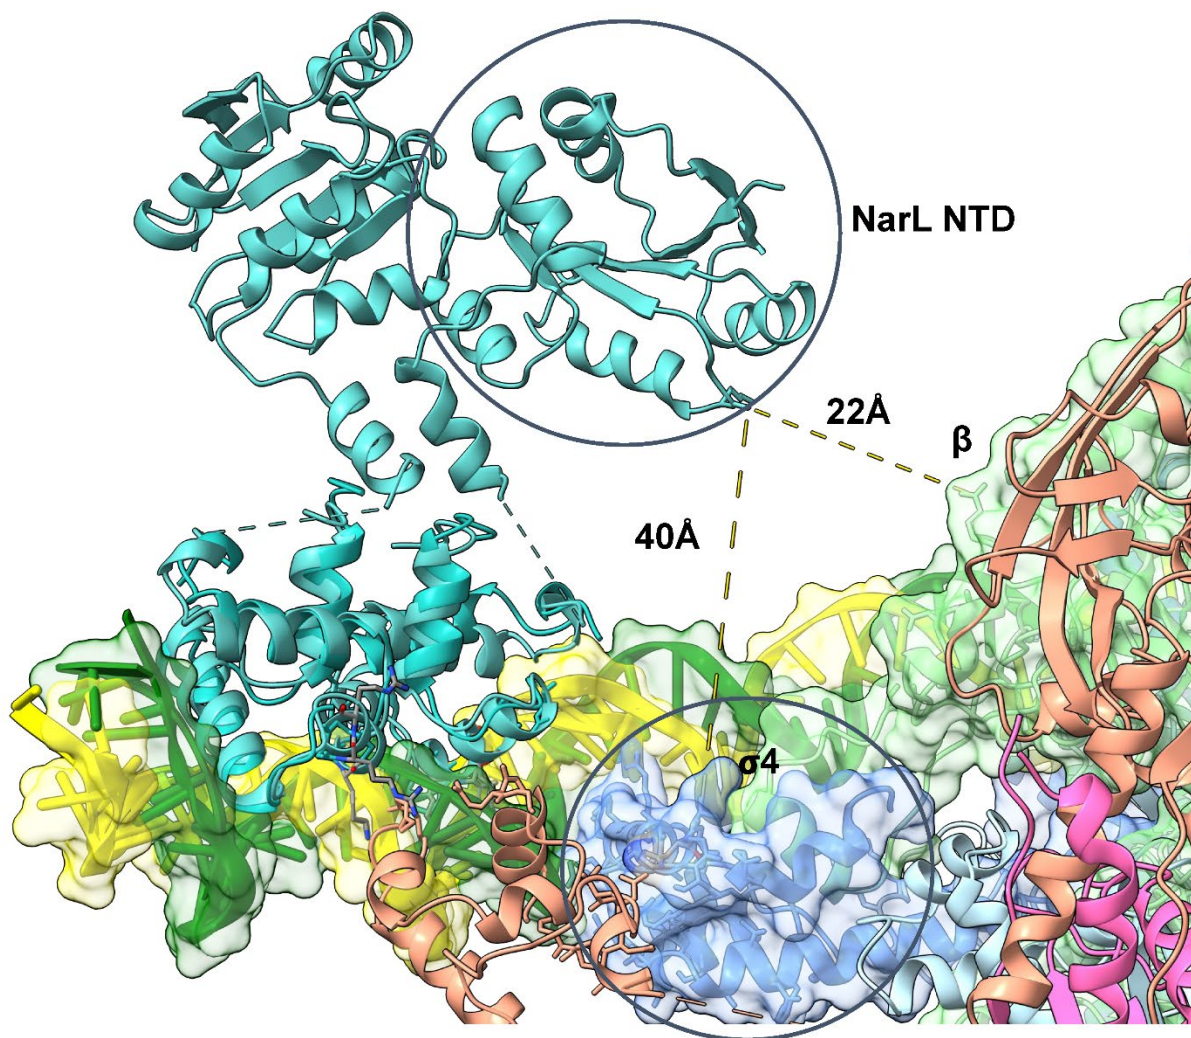

**Supplementary Figure S4. The docked model of NarL NTD in the NarL-TAC complex.** Docked NarL NTD is shown in the intact complex. Two distances between NarL NTD and  $\sigma 4$ , and between NarL NTD and  $\beta$  subunit are labeled. The color scheme is same as Figure 1.



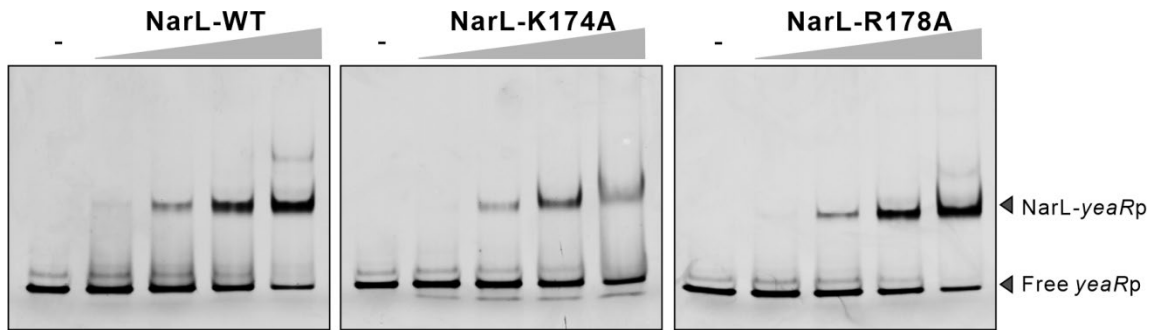

**Supplementary Figure S6. Interactions between NarL and *yeaR* promoter as tested by EMSA assay.** Wild-type (WT), Lys174 and Arg178 mutated NarL proteins were used at final concentrations of 0, 200, 400, 800, 1600 nM respectively in these assays.



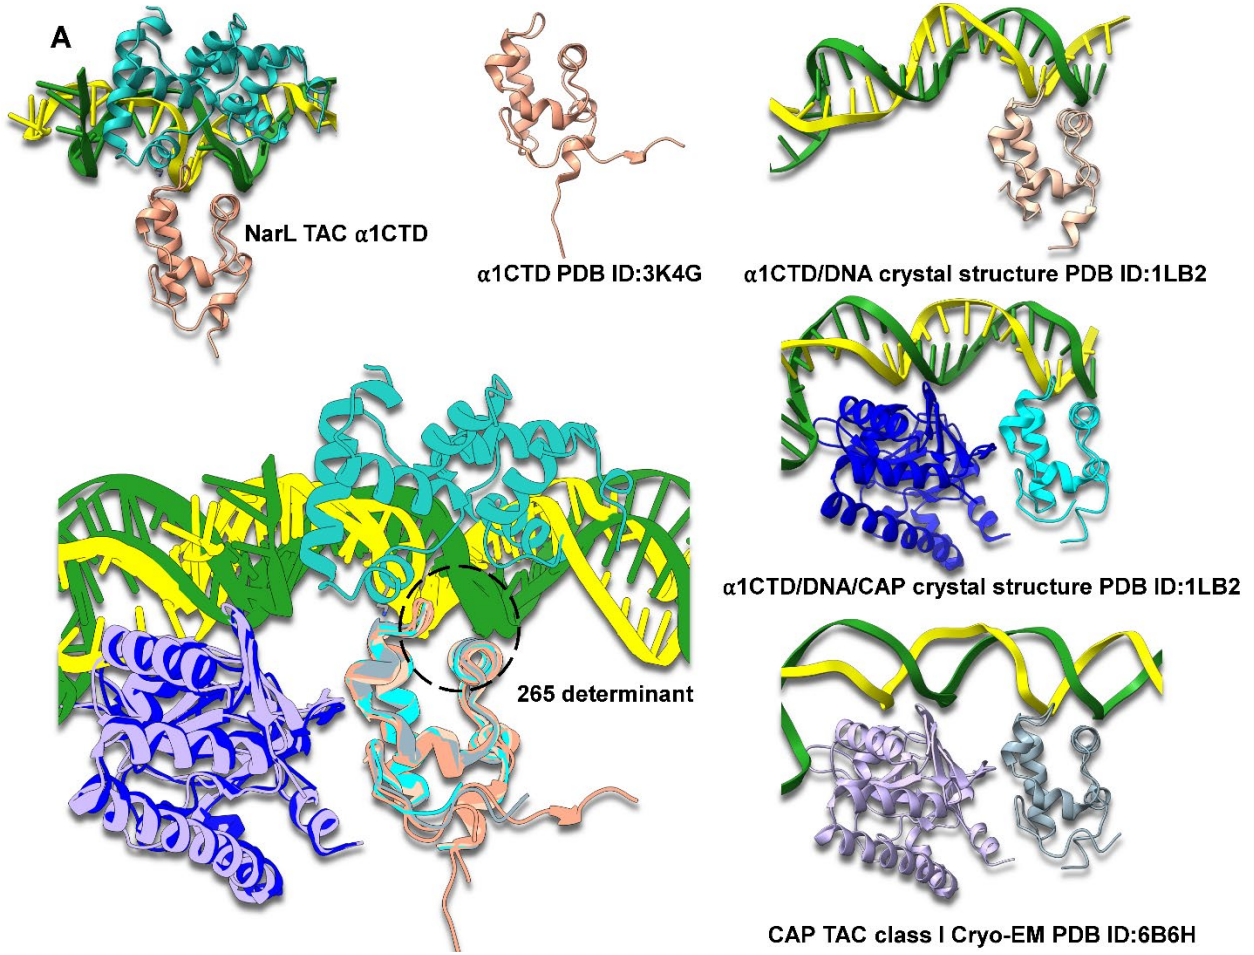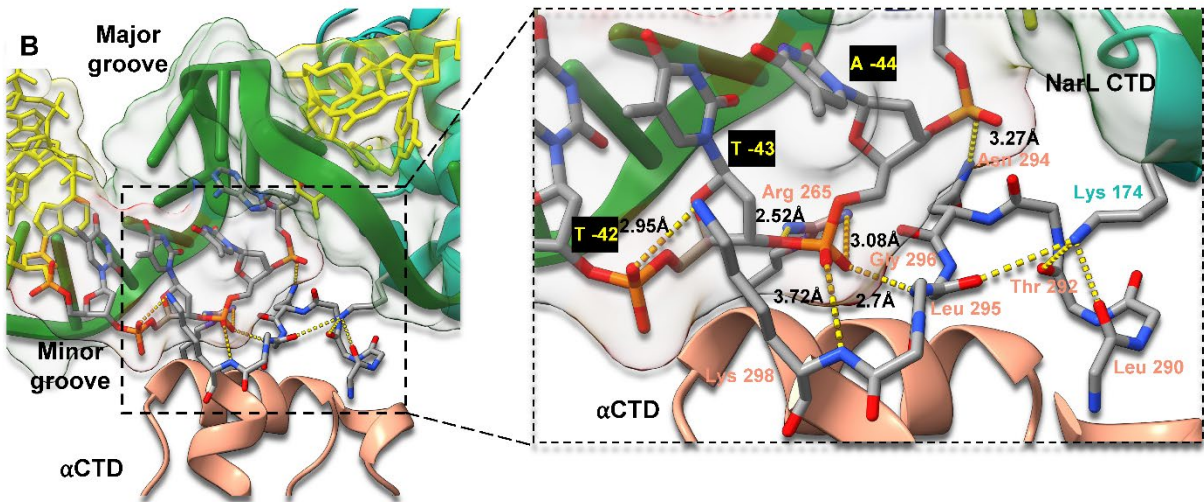

**Supplementary Figure S7. Comparison of  $\alpha$ CTD/DNA interfaces from different complexes.**

**(A)** The  $\alpha$ 1CTD/DNA interface of this NarL-TAC; crystal structures of  $\alpha$ CTD alone (PDB ID:3K4G); crystal structure of  $\alpha$ CTD/DNA from CAP/ $\alpha$ CTD/DNA structure (PDB ID:1LB2), in which the  $\alpha$ CTD subunit doesn't interact with CAP; crystal structure of CAP/ $\alpha$ CTD/DNA structure (PDB ID:1LB2); the interface from the cryo-EM structure of class I CAP TAC (PDB ID:6B6H); overlay of the different structures with the R265 region encircled. **(B)** View of DNA- $\alpha$ CTD interface in this complex. The interacted DNA and  $\alpha$ CTD residues are shown in stick representations.

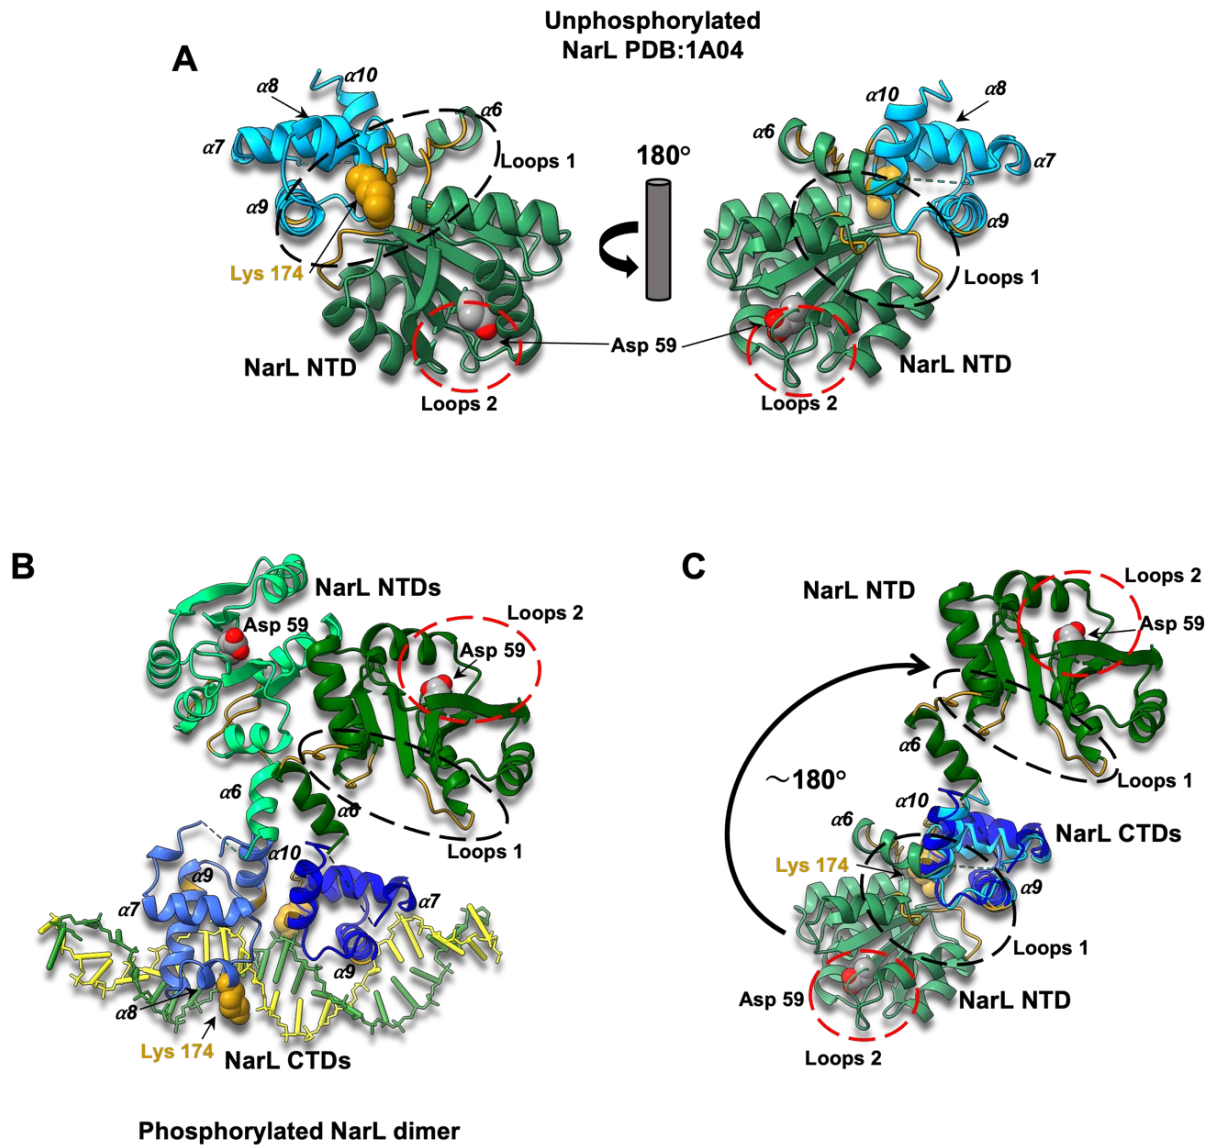

**Supplementary Figure S8. Comparison of unphosphorylated NarL and phosphorylated NarL.** (A) Overview of the crystal structure of NarL (PDB ID: 1A04). Phosphorylation site (Asp59) and Lys174 are represented as balls; loops on the interdomain interface are labeled dark goldenrod. (B) The NarL/DNA region of this NarL-TAC. (C) Superposition of unphosphorylated NarL (PDB ID: 1A04) and a monomer of phosphorylated NarL from this structure. The movement direction of NarL NTD is indicated by the arrow. Positions of Loops 1 and Loops 2 are highlighted

by black and red broken circles, respectively. Phosphorylation of Asp59 triggers structural changes in the loops around it (Loops 2). Such changes will further trigger changes in the interdomain interface loops (Loops 1), disrupting this interface and leading to NarL NTD movement.

**Supplementary Table S1. Strains, plasmids, and oligos used in this study.**

| Name                                | Application, characters, or sequences                                                                       | Source                   |
|-------------------------------------|-------------------------------------------------------------------------------------------------------------|--------------------------|
| <b>Strains</b>                      |                                                                                                             |                          |
| <i>E. coli</i> BL21(DE3)            | Protein expression                                                                                          | Novagen                  |
| <i>E. coli</i> DH5 $\alpha$         | Cloning construction                                                                                        | Novagen                  |
| <i>E. coli</i> $\Delta$ <i>lacZ</i> | <i>E. coli</i> strain MG1655 with deletion of <i>lacZ</i> gene.                                             | (67)                     |
| <i>E. coli narL-K174A</i>           | <i>E. coli</i> $\Delta$ <i>lacZ</i> expressing K174A mutated NarL protein on the genome                     | This study               |
| <i>E. coli narL-R178A</i>           | <i>E. coli</i> $\Delta$ <i>lacZ</i> expressing R178A mutated NarL protein on the genome                     | This study               |
| <b>Plasmids</b>                     |                                                                                                             |                          |
| pVS10-RNAP                          | Plasmid expressing <i>E. coli</i> RNAP core enzyme, $\beta'$ subunit with C-terminal His <sub>6</sub> -tag. | Addgene                  |
| pVS10-d $\alpha$ CTD                | Plasmid expressing <i>E. coli</i> RNAP core enzyme with deletion of $\alpha$ CTD.                           | This study               |
| pCas                                | Plasmid expressing spCas9 protein                                                                           | (68)                     |
| pTargetF                            | Plasmid for expressing sgRNA                                                                                | (68)                     |
| pET21a-NarL                         | pET21a expressing wild-type NarL protein with C-terminal His <sub>6</sub> -tag                              | This study               |
| pET21a-NarL-K174A                   | pET21a expressing K174A mutated NarL protein with C-terminal His <sub>6</sub> -tag                          | This study               |
| pET21a-NarL-R178A                   | pET21a expressing R178A mutated NarL protein with C-terminal His <sub>6</sub> -tag                          | This study               |
| pZT- <i>yeaR</i> p                  | Plasmid containing the <i>yeaR</i> :: <i>lacZ</i> fusion                                                    | This study               |
| <b>Oligos (5'-3')</b>               |                                                                                                             |                          |
| Nontemplate DNA                     | GGTGCTAGTAACCAATAAATGGTAT<br>TTAAAATGCAAATTATCAGGCGTACC<br>CTCTTTGCGAATTCGCGGCAGCGG                         | IDT, USA                 |
| Template DNA                        | CCGCTGCCGCGAATTCCGTTTCAGG<br>GTACGCCTGATAATTTGCATTTTAAA<br>TACCATTATTGGTTACTAGCACC                          | IDT, USA                 |
| <i>narL</i> -for                    | GGAATTCATATGAGTAATCAGGAA<br>CCGGC                                                                           | IDT, USA                 |
| <i>narL</i> -rev                    | TAACCGCTCGAGGAAAATGCGCTCC<br>TGATGC                                                                         | IDT, USA                 |
| <i>narL</i> target region 1         | CGGGCATATTGAGATCTAAC                                                                                        | Sangon<br>Biotech, China |



---

|                             |                                                                 |                          |
|-----------------------------|-----------------------------------------------------------------|--------------------------|
| <i>narL</i> target region 1 | TTCGGTGATATCCAGGCGGC                                            | Sangon<br>Biotech, China |
| <i>narL</i> -K174A-U-F      | CGTGGTGACGGTGGCGCAAACG                                          | Sangon<br>Biotech, China |
| <i>narL</i> -K174A-U-R      | GGCGAGCTATCATCGCATTCGGCAA<br>ACCCTGGGCAATCAG                    | Sangon<br>Biotech, China |
| <i>narL</i> -K174A-D-F      | GGGTTTGCCGAATGCGATGATAGCT<br>CGCCGGCTGGATATCACCGAAAGCA<br>CAGT  | Sangon<br>Biotech, China |
| <i>narL</i> -K174A-D-R      | CCTGTGCCATTAGTCACTGTGAC                                         | Sangon<br>Biotech, China |
| <i>narL</i> -R178A-U-F      | CGTGGTGACGGTGGCGCAAACG                                          | Sangon<br>Biotech, China |
| <i>narL</i> -R178A-U-R      | GGGCAGCTATCATCTTATTCGGCAA<br>ACCCTGGGCAATCAG                    | Sangon<br>Biotech, China |
| <i>narL</i> -R178A-D-F      | GGGTTTGCCGAATAAGATGATAGCT<br>GCCCCGGCTGGATATCACCGAAAGCA<br>CAGT | Sangon<br>Biotech, China |
| <i>narL</i> -R178A-D-R      | CCTGTGCCATTAGTCACTGTGAC                                         | Sangon<br>Biotech, China |
| <i>yeaRp</i> -F             | CTAGTCACGTCACGGCCGAGCTTCC<br>TGATTATATCTGGTGC                   | Sangon<br>Biotech, China |
| <i>yeaRp</i> -R             | CCCTCCTTCGGTGAATGCGCT                                           | Sangon<br>Biotech, China |
| <i>yeaR</i> -qPCR-F         | ACAGGGTATTGAACTGGCGG                                            | Sangon<br>Biotech, China |
| <i>yeaR</i> -qPCR-R         | TGAATACCACAATGCGCCCT                                            | Sangon<br>Biotech, China |
| 16s-qPCR-F                  | CGGTAATACGGAGGGTGCAA                                            | Sangon<br>Biotech, China |
| 16s-qPCR-R                  | CGAGACTCAAGCTTGCCAGT                                            | Sangon<br>Biotech, China |

---

**Supplementary Table S2. Cryo-EM data collection, refinement, and validation statistics.**

|                                            | <b>NarLTAC</b> | <b>Local refinement on the NarL region</b> |
|--------------------------------------------|----------------|--------------------------------------------|
| <b>Data collection/processing</b>          |                |                                            |
| Microscope                                 | Krios          | Krios                                      |
| Voltage (kV)                               | 300            | 300                                        |
| Camera                                     | K3             | K3                                         |
| Camera mode                                | Counting, CDS  | Counting, CDS                              |
| Defocus range ( $\mu\text{m}$ )            | -0.75 ~ -2.5   | -0.75 ~ -2.5                               |
| Electron exposure ( $e^-/\text{\AA}^2$ )   | 42             | 42                                         |
| Magnification                              | 130,000        | 130,000                                    |
| Magnified pixel size ( $\text{\AA}$ )      | 0.664          | 0.664                                      |
| <b>Reconstruction</b>                      |                |                                            |
| Symmetry                                   | C1             | C1                                         |
| Particles refined                          | 104,500        | 104,500                                    |
| Resolution ( $\text{\AA}$ )                | 3.2            | 4.4                                        |
| Map sharpening B-factor ( $\text{\AA}^2$ ) | -92.9          | -223.2                                     |
| Access code                                | EMD-41856      | EMD-41856                                  |
| <b>Model Statistics</b>                    |                |                                            |
| Number of residues (modeled)               | 3998           |                                            |
| Map CC                                     | 0.89           |                                            |
| MolProbity score                           | 1.92           |                                            |
| All-atom Clashscore                        | 10.77          |                                            |
| C $\beta$ deviations                       | 0              |                                            |
| Rotamer outliers                           | 0.0%           |                                            |
| Ramachandran plot                          |                |                                            |
| Outliers                                   | 0.13%          |                                            |
| Allowed                                    | 5.33%          |                                            |
| Favored                                    | 94.54%         |                                            |
| RMS deviations                             |                |                                            |
| Bond length                                | 0.011          |                                            |
| Bond angles                                | 0.945          |                                            |
| Access code                                | 8U3B           |                                            |

**Supplementary Table S3. Raw data for RT-qPCR assay.**

| Data Set | Target | Sample       | Mean Cq | Cq SEM  | Expression     | Grouping   | Calculation Method                                                           | Relative Quantification |
|----------|--------|--------------|---------|---------|----------------|------------|------------------------------------------------------------------------------|-------------------------|
| 1-SYBR   | 16S    | WT-1         | 10.07   | 0.08172 | Reference Gene |            |                                                                              |                         |
| 1-SYBR   | 16S    | WT-2         | 9.91    | 0.13110 |                |            |                                                                              |                         |
| 1-SYBR   | 16S    | WT-3         | 9.94    | 0.12243 |                |            |                                                                              |                         |
| 1-SYBR   | 16S    | WT-1 KNO3    | 9.77    | 0.18404 |                |            |                                                                              |                         |
| 1-SYBR   | 16S    | WT-2 KNO3    | 9.40    | 0.00687 |                |            |                                                                              |                         |
| 1-SYBR   | 16S    | WT-3 KNO3    | 9.39    | 0.02759 |                |            |                                                                              |                         |
| 1-SYBR   | 16S    | K174A-1      | 9.88    | 0.14005 |                |            |                                                                              |                         |
| 1-SYBR   | 16S    | K174A-2      | 9.70    | 0.00408 |                |            |                                                                              |                         |
| 1-SYBR   | 16S    | K174A-3      | 9.55    | 0.00261 |                |            |                                                                              |                         |
| 1-SYBR   | 16S    | K174A-1 KNO3 | 9.62    | 0.06700 |                |            |                                                                              |                         |
| 1-SYBR   | 16S    | K174A-2 KNO3 | 11.14   | 0.07434 |                |            |                                                                              |                         |
| 1-SYBR   | 16S    | K174A-3 KNO3 | 9.24    | 0.01340 |                |            |                                                                              |                         |
| 1-SYBR   | 16S    | R178A-1      | 9.96    | 0.09901 |                |            |                                                                              |                         |
| 1-SYBR   | 16S    | R178A-2      | 10.02   | 0.01367 |                |            |                                                                              |                         |
| 1-SYBR   | 16S    | R178A-3      | 9.99    | 0.06803 |                |            |                                                                              |                         |
| 1-SYBR   | 16S    | R178A-1 KNO3 | 9.76    | 0.00488 |                |            |                                                                              |                         |
| 1-SYBR   | 16S    | R178A-2 KNO3 | 9.66    | 0.06765 |                |            |                                                                              |                         |
| 1-SYBR   | 16S    | R178A-3 KNO3 | 10.23   | 0.03360 |                |            |                                                                              |                         |
| 1-SYBR   | yeaR   | WT-1         | 30.90   | 0.02713 | 0.00648        | Control-1  | $\text{Expression}_{\text{control-1}}/\text{Expression}_{\text{control-1}}$  | 1                       |
| 1-SYBR   | yeaR   | WT-2         | 31.24   | 0.30401 | 0.00456        | Control-2  | $\text{Expression}_{\text{control-2}}/\text{Expression}_{\text{control-2}}$  | 1                       |
| 1-SYBR   | yeaR   | WT-3         | 31.45   | 0.35734 | 0.00405        | Control-3  | $\text{Expression}_{\text{control-3}}/\text{Expression}_{\text{control-3}}$  | 1                       |
| 1-SYBR   | yeaR   | WT-1 KNO3    | 24.60   | 0.10284 | 0.41325        | Sample-A-1 | $\text{Expression}_{\text{sample-A-1}}/\text{Expression}_{\text{control-1}}$ | 63.794452               |
| 1-SYBR   | yeaR   | WT-2 KNO3    | 22.80   | 0.13485 | 0.49687        | Sample-A-2 | $\text{Expression}_{\text{sample-A-2}}/\text{Expression}_{\text{control-2}}$ | 109.05146               |
| 1-SYBR   | yeaR   | WT-3 KNO3    | 25.36   | 0.24506 | 0.18798        | Sample-A-3 | $\text{Expression}_{\text{sample-A-3}}/\text{Expression}_{\text{control-3}}$ | 46.381693               |
| 1-SYBR   | yeaR   | K174A-1      | 31.30   | 0.16642 | 0.00430        | Sample-B-1 | $\text{Expression}_{\text{sample-B-1}}/\text{Expression}_{\text{control-1}}$ | 0.6640412               |
| 1-SYBR   | yeaR   | K174A-2      | 32.64   | 0.09296 | 0.00150        | Sample-B-2 | $\text{Expression}_{\text{sample-B-2}}/\text{Expression}_{\text{control-2}}$ | 0.3301628               |
| 1-SYBR   | yeaR   | K174A-3      | 32.21   | 0.32519 | 0.00181        | Sample-B-3 | $\text{Expression}_{\text{sample-B-3}}/\text{Expression}_{\text{control-3}}$ | 0.4467674               |
| 1-SYBR   | yeaR   | K174A-1 KNO3 | 28.10   | 0.24500 | 0.03297        | Sample-C-1 | $\text{Expression}_{\text{sample-C-1}}/\text{Expression}_{\text{control-1}}$ | 5.089892                |
| 1-SYBR   | yeaR   | K174A-2 KNO3 | 31.45   | 0.28301 | 0.00929        | Sample-C-2 | $\text{Expression}_{\text{sample-C-2}}/\text{Expression}_{\text{control-2}}$ | 2.0392618               |

|        |      |              |       |         |         |            |                                                                                      |           |
|--------|------|--------------|-------|---------|---------|------------|--------------------------------------------------------------------------------------|-----------|
| 1-SYBR | yeaR | K174A-3 KNO3 | 28.85 | 0.03056 | 0.01502 | Sample-C-3 | $\frac{\text{Expression}_{\text{sample-C-3}}}{\text{Expression}_{\text{control-3}}}$ | 3.7049326 |
| 1-SYBR | yeaR | R178A-1      | 32.77 | 0.37086 | 0.00164 | Sample-D-1 | $\frac{\text{Expression}_{\text{sample-D-1}}}{\text{Expression}_{\text{control-1}}}$ | 0.2530666 |
| 1-SYBR | yeaR | R178A-2      | 31.88 | 0.17903 | 0.00317 | Sample-D-2 | $\frac{\text{Expression}_{\text{sample-D-2}}}{\text{Expression}_{\text{control-2}}}$ | 0.6947316 |
| 1-SYBR | yeaR | R178A-3      | 32.53 | 0.50138 | 0.00198 | Sample-D-3 | $\frac{\text{Expression}_{\text{sample-D-3}}}{\text{Expression}_{\text{control-3}}}$ | 0.4876684 |
| 1-SYBR | yeaR | R178A-1 KNO3 | 25.63 | 0.26149 | 0.20057 | Sample-E-1 | $\frac{\text{Expression}_{\text{sample-E-1}}}{\text{Expression}_{\text{control-1}}}$ | 30.962816 |
| 1-SYBR | yeaR | R178A-2 KNO3 | 25.06 | 0.06583 | 0.27876 | Sample-E-2 | $\frac{\text{Expression}_{\text{sample-E-2}}}{\text{Expression}_{\text{control-2}}}$ | 61.181317 |
| 1-SYBR | yeaR | R178A-3 KNO3 | 25.35 | 0.20979 | 0.33729 | Sample-E-3 | $\frac{\text{Expression}_{\text{sample-E-3}}}{\text{Expression}_{\text{control-3}}}$ | 83.22159  |
